# Supplementary material
Source: PubMed Central journal article supplement (PMC4557689)

Supplemental Figure 1

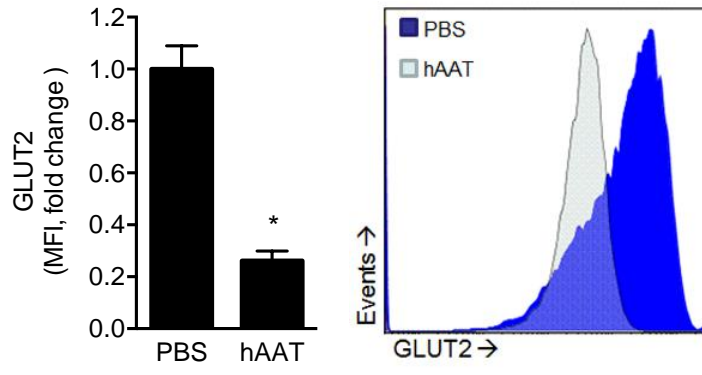

Supplement: imm0144-0530-sd1.pdf [file imm0144-0530-sd1.pdf]

Supplemental Figure 2

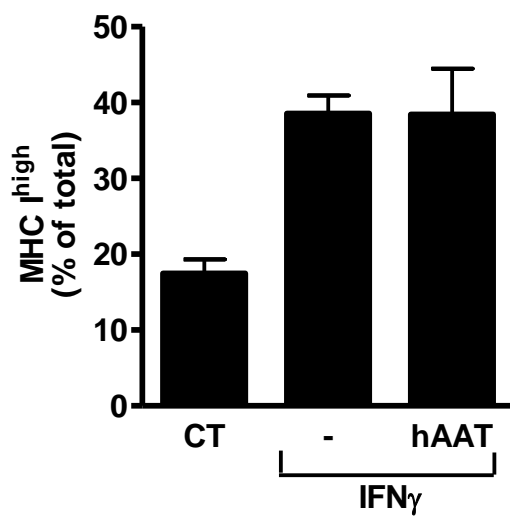

Supplement: imm0144-0530-sd2.pdf [file imm0144-0530-sd2.pdf]
